# Supplementary material for: Characterizing the near-global cloud vertical structures over land using high-resolution radiosonde measurements
Source: Copernicus journal article supplement (doi:10.5194/acp-23-15011-2023), 2023-12-06
Supplement: Supplementary file 1 [file acp-23-15011-2023-supplement.pdf]

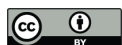

*Supplement of*

## **Characterizing the near-global cloud vertical structures over land using high-resolution radiosonde measurements**

**Hui Xu et al.**

*Correspondence to:* Jianping Guo (jpguocams@gmail.com) and Bing Tong (bingtong@rcees.ac.cn)

The copyright of individual parts of the supplement might differ from the article licence.

## FIGURES

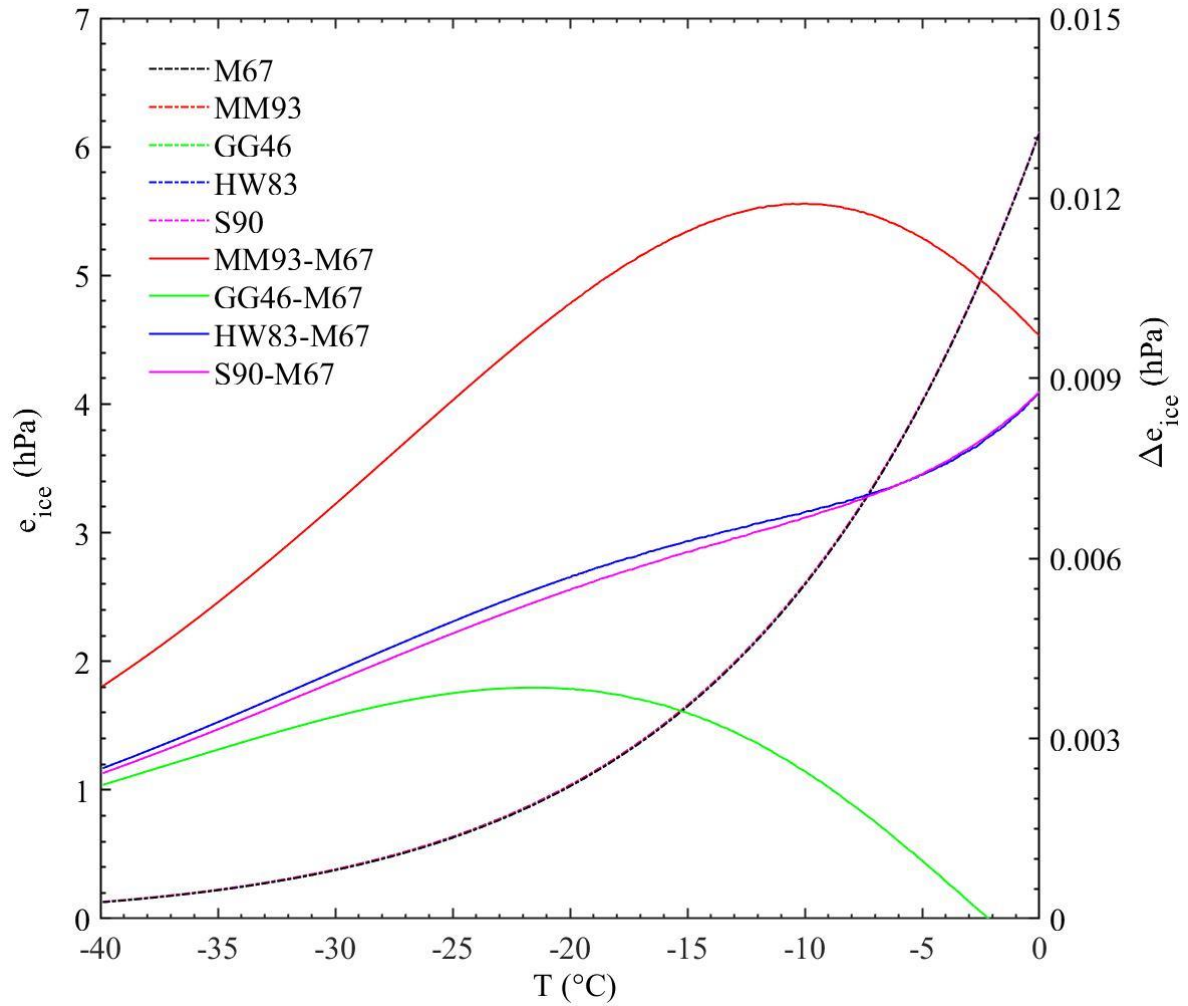

2

3 **Figure S1.** The saturation vapor pressure in the pure ice phase ( $e_{ice}$ ) for  $-40$  to  $0$  °C  
 4 calculated by the expression in Murray (1967) (M76), Marti and Mauersberger (1993)  
 5 (MM93), Goff and Gratch (1946) (GG46), Hyland and Wexler (1983) (HW83), and Sonntag  
 6 (1990) (S90). Also shown is the absolute difference in  $e_{ice}$  between M76 with MM93, GG46,  
 7 HW83, and S90, respectively.

8

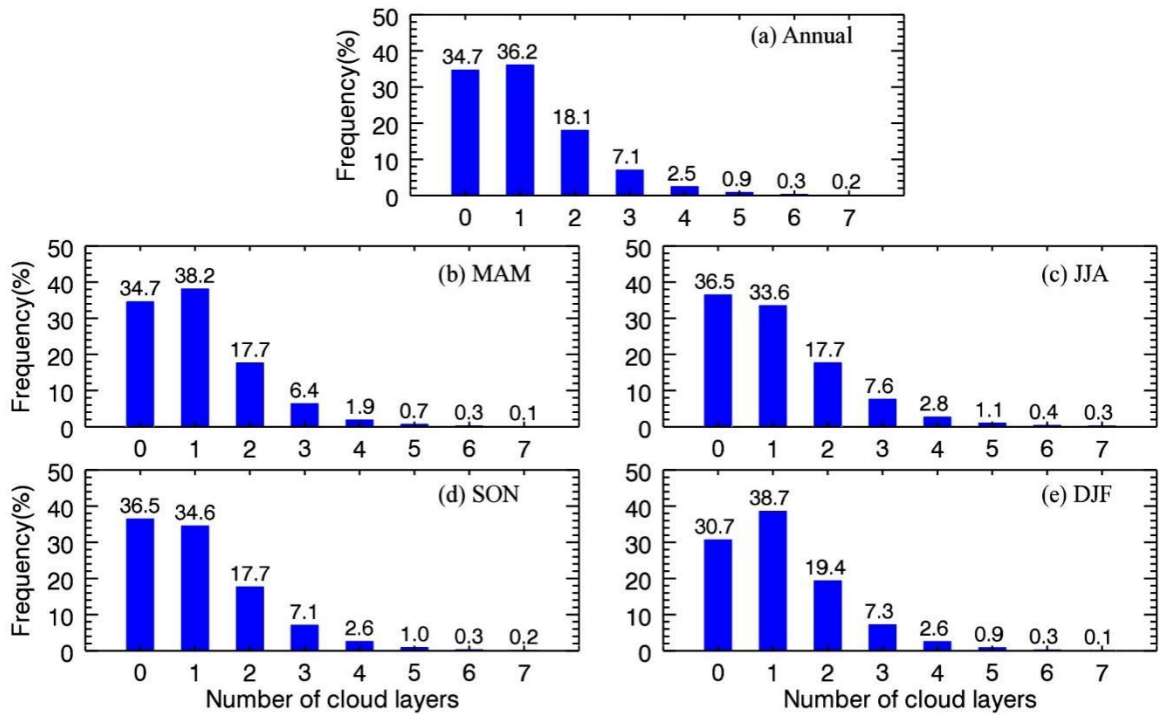

9  
 10 **Figure S2.** Near-global mean occurrence frequencies of clouds with a variety of layers  
 11 ranging from 0 to 7 as detected by high-resolution radiosonde measurements at 0000 UTC  
 12 during the period of 2018–2019: (a) annual, (b) March–April–May (MAM), (c) June–July–  
 13 August (JJA), (d) September–October–November (SON), and (e) December–January–  
 14 February (DJF). Also marked is the probability for the specified cloud type at the top of each  
 15 bar.

16  
 17

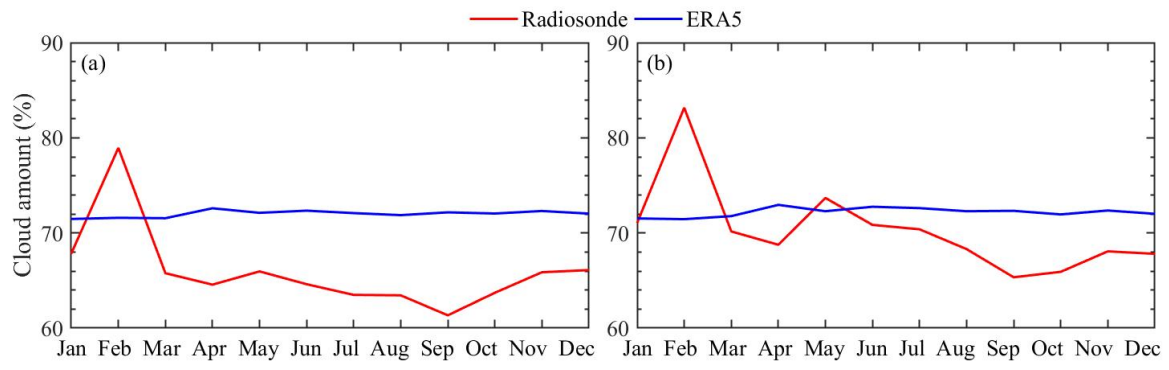

18  
 19 **Figure S3.** The monthly cloud fraction at (a) 0000 UTC, and (b) 1200 UTC. The red and  
 20 blue lines represent the cloud amount from radiosonde and ERA5, respectively.  
 21

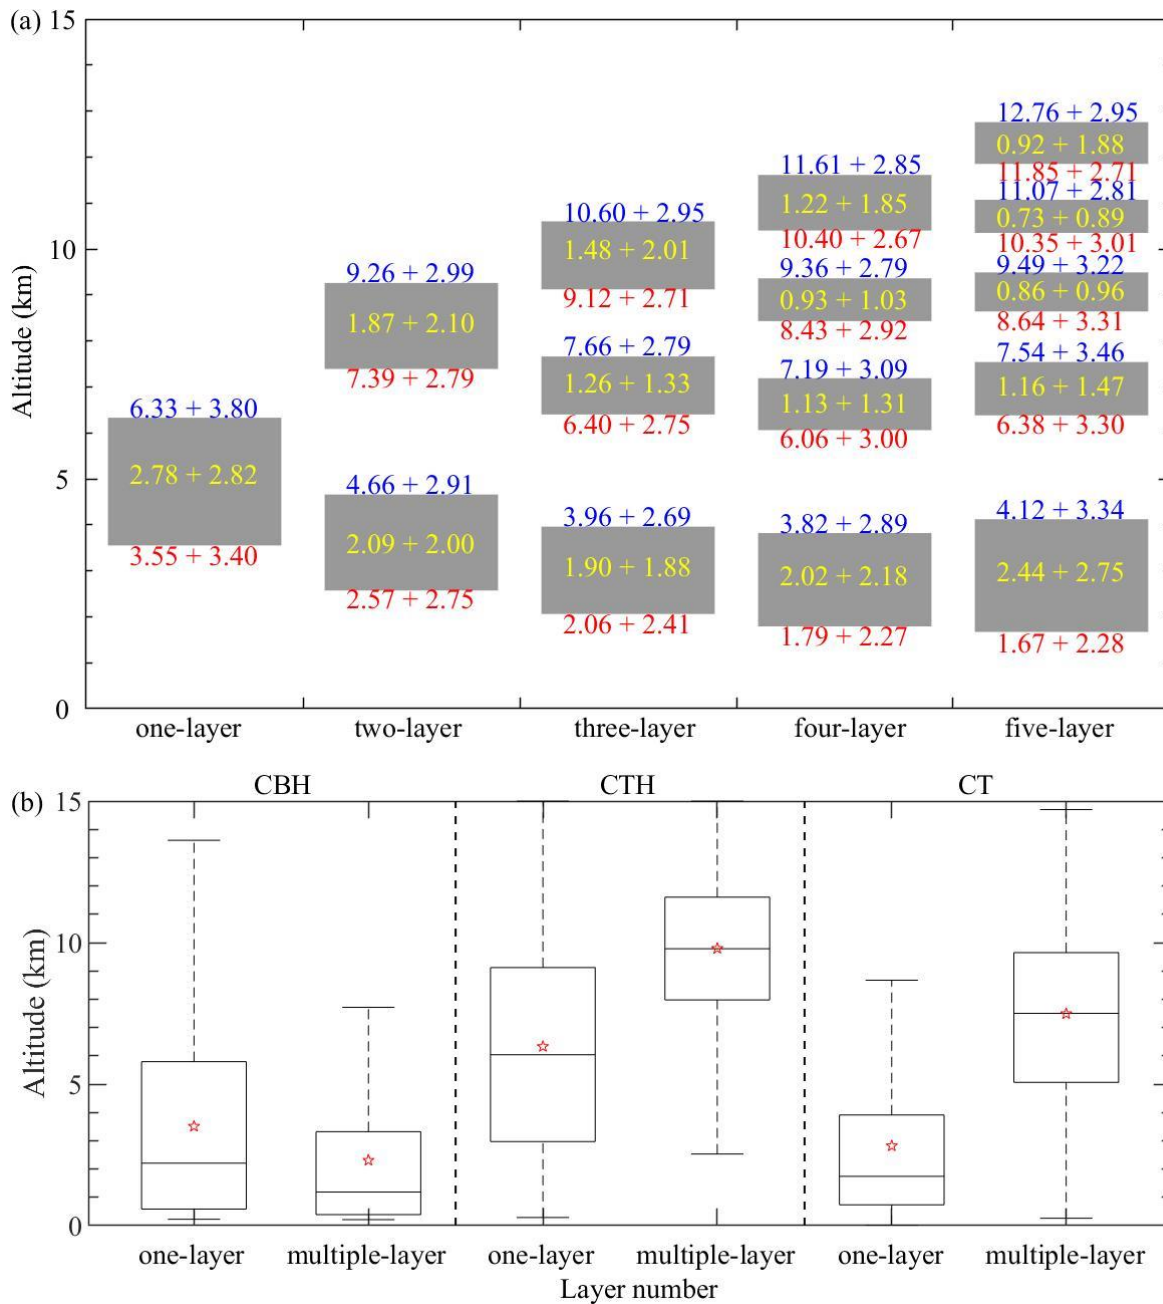

22

23 **Figure S4.** Near-global annual mean (a) vertical locations of one-, two-, three-, four-, and  
 24 five-layer clouds and (b) boxplot of CVS (CBH, CTH, and CT) for one- and multi-layer  
 25 clouds at 0000 UTC during the period of 2018–2019. The mean  $\pm$  one standard deviation  
 26 values of CBH, CTH, and CT for each cloud type are also marked in (a).

27

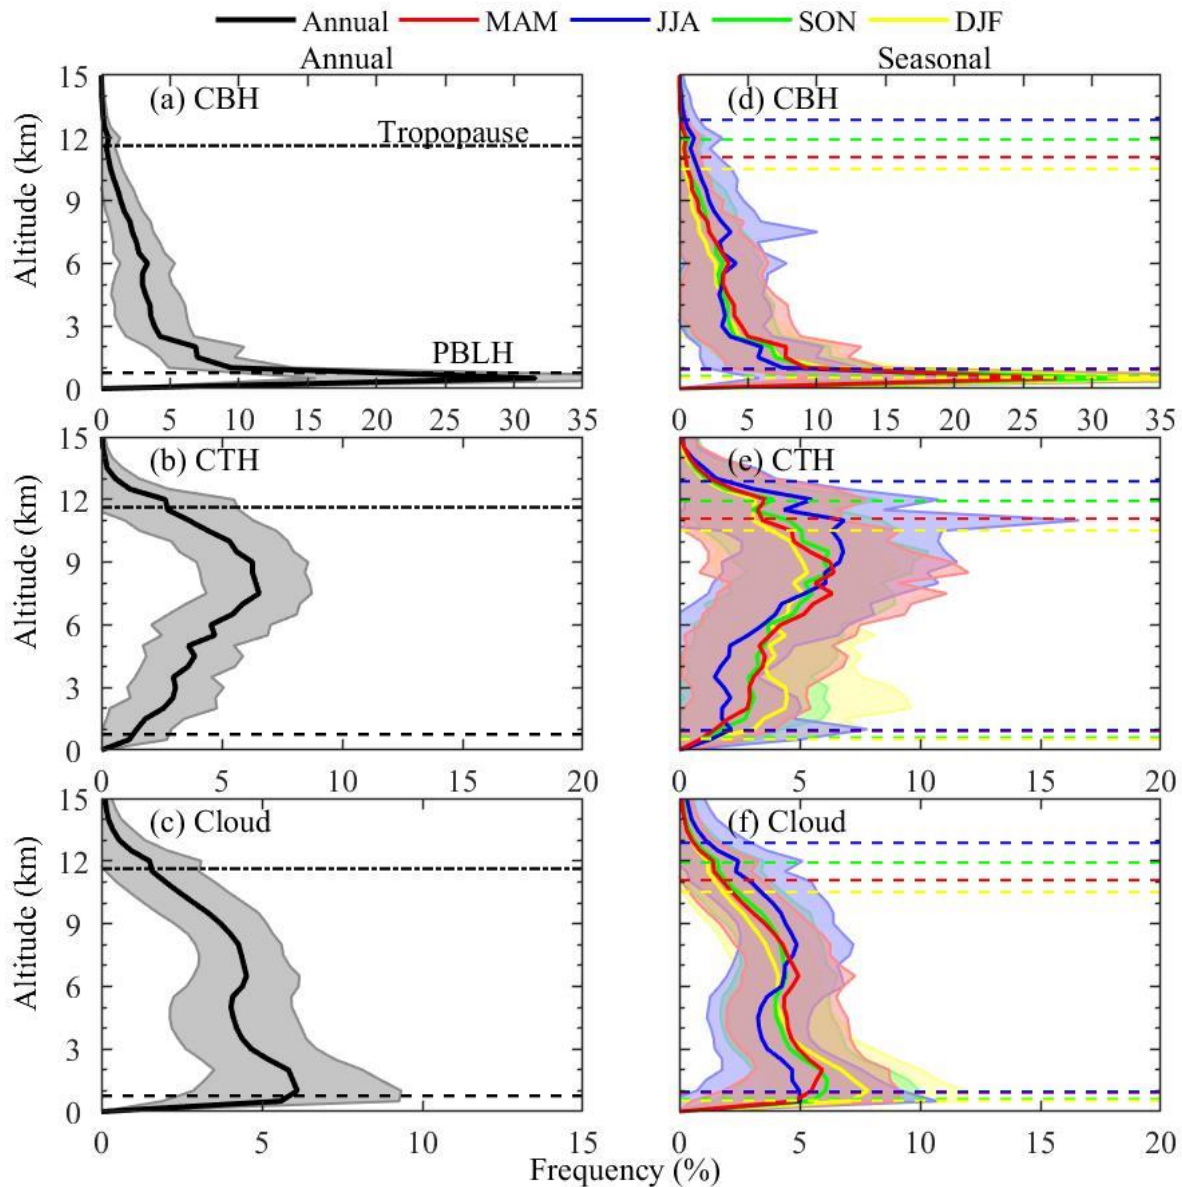

28  
 29 **Figure S5.** Near-global mean vertical distributions of (a, b, and c) annual and (d, e, and f)  
 30 seasonal occurrence frequencies of CBHs, CTHs, and clouds as detected by radiosonde data  
 31 at 0000 UTC during the period of 2018–2019, respectively. The annual, MAM, JJA, SON,  
 32 and DJF are marked in black, red, blue, green, and yellow, respectively. Samples are  
 33 vertically divided with a resolution of 500 m. The percentage for a given altitude is defined as  
 34 the ratio of cloudy samples on that altitude to all cloudy samples. The solid lines are the mean  
 35 values and shadows are the one standard deviation at annual or a given season. The planetary  
 36 boundary layer height (PBLH) is determined with the method proposed by Vogelezang and  
 37 Holtslag (1996), marked in dot-hyphen, and the tropopause is defined with the method from  
 38 WMO (1957), marked in hyphen. The determination of PBLH and tropopause are detailed in  
 39 the Supplementary Information.



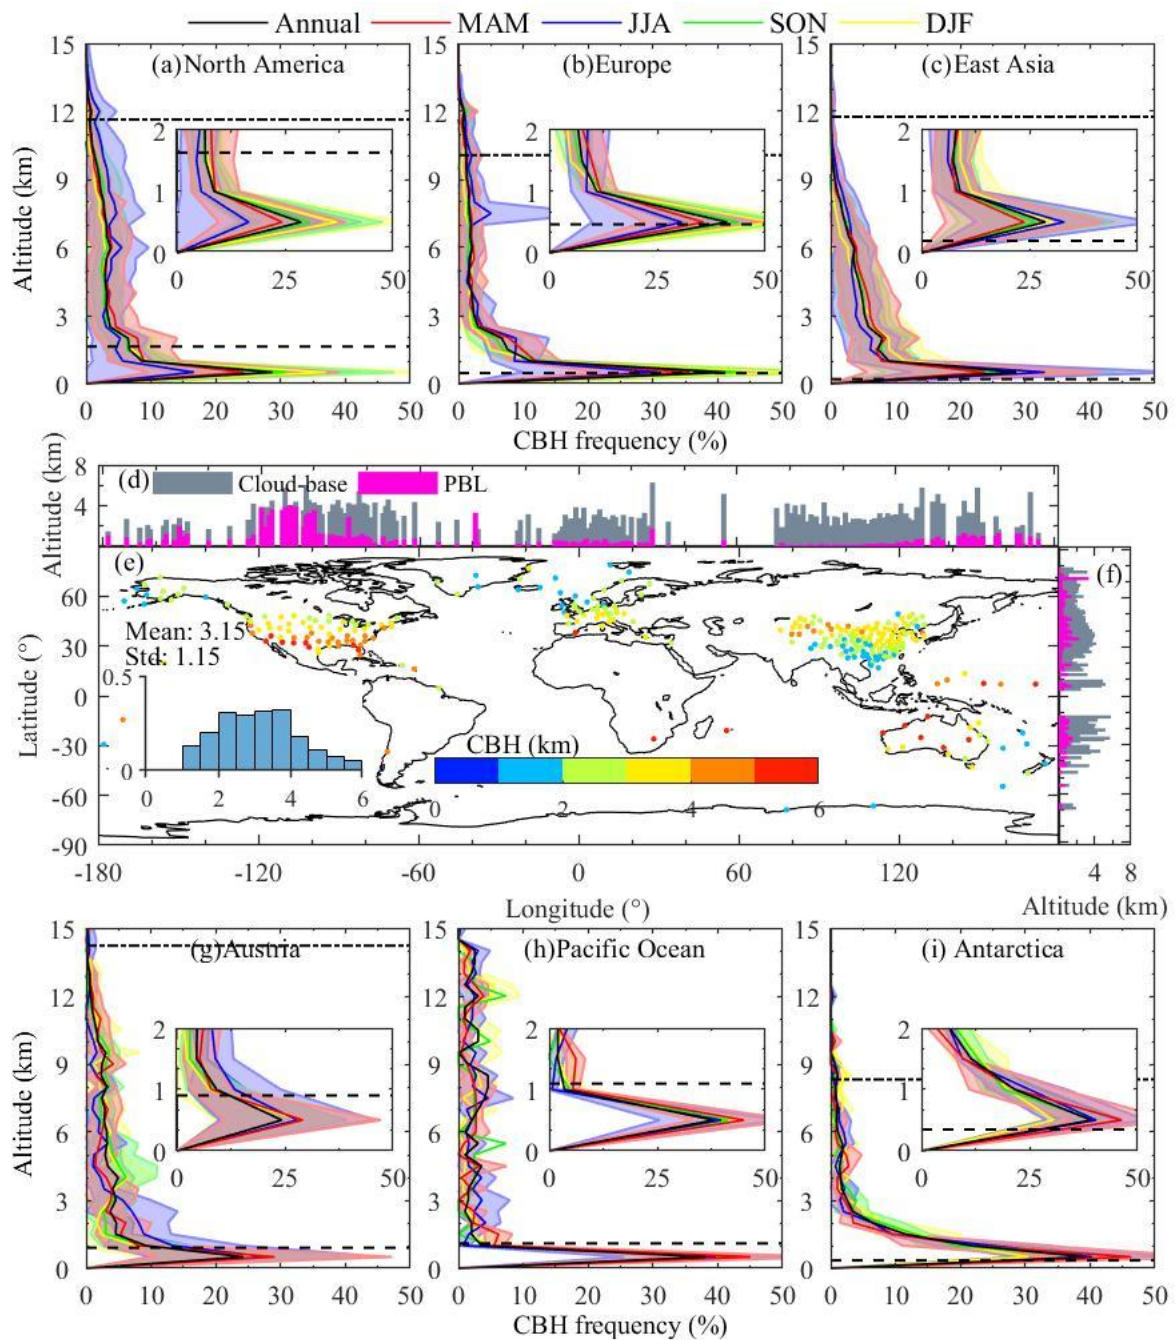

40  
 41 **Figure S6.** Regional mean vertical distributions of the occurrence frequencies of CBHs at  
 42 0000 UTC during the period of 2018–2019. The altitude resolved annual and seasonal  
 43 averaged occurrence frequencies of CBHs are displayed in (a, b, c, g, h, and i) over six  
 44 regions of interest, including North America, Europe, East Asia, Austria, Pacific Ocean, Polar.  
 45 Also shown are the near-global geographic distribution of the annual mean CBH (e), with the  
 46 histogram of the probability distribution for CBH in the inset and the corresponding  
 47 meridional (d) and zonal (f) means overlaid with the mean PBLH.

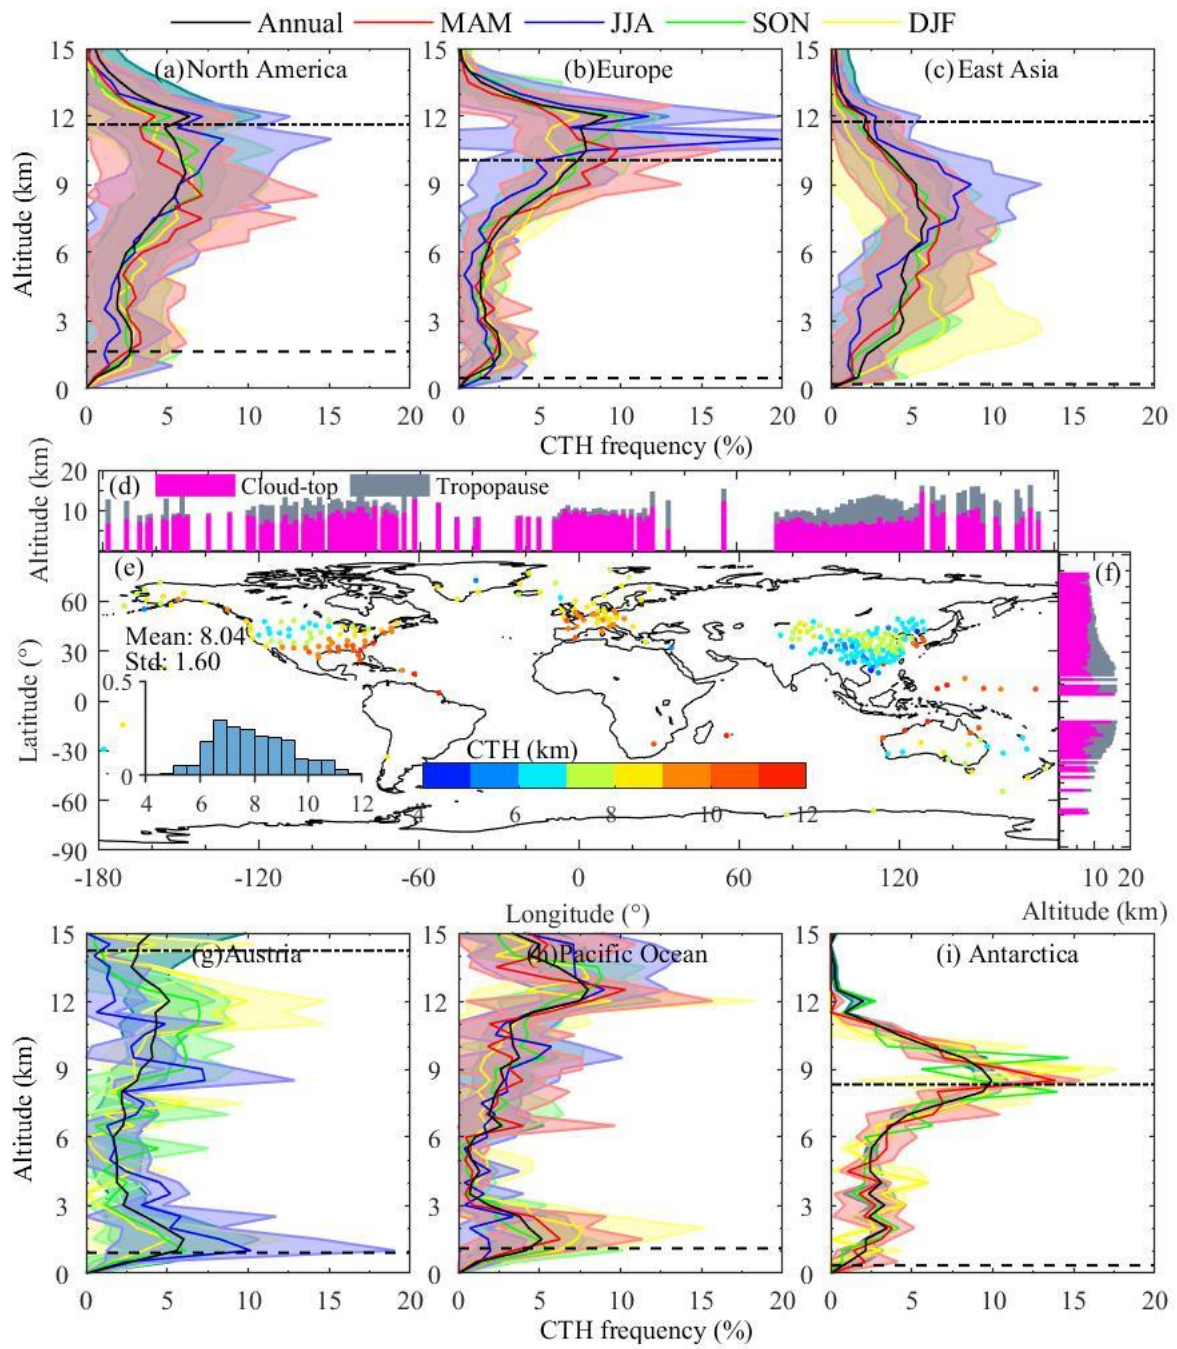

48

49 **Figure S7.** Similar as Fig. 6, but for the occurrence frequencies of CTHs at 0000 UTC during  
 50 the period of 2018–2019.

51



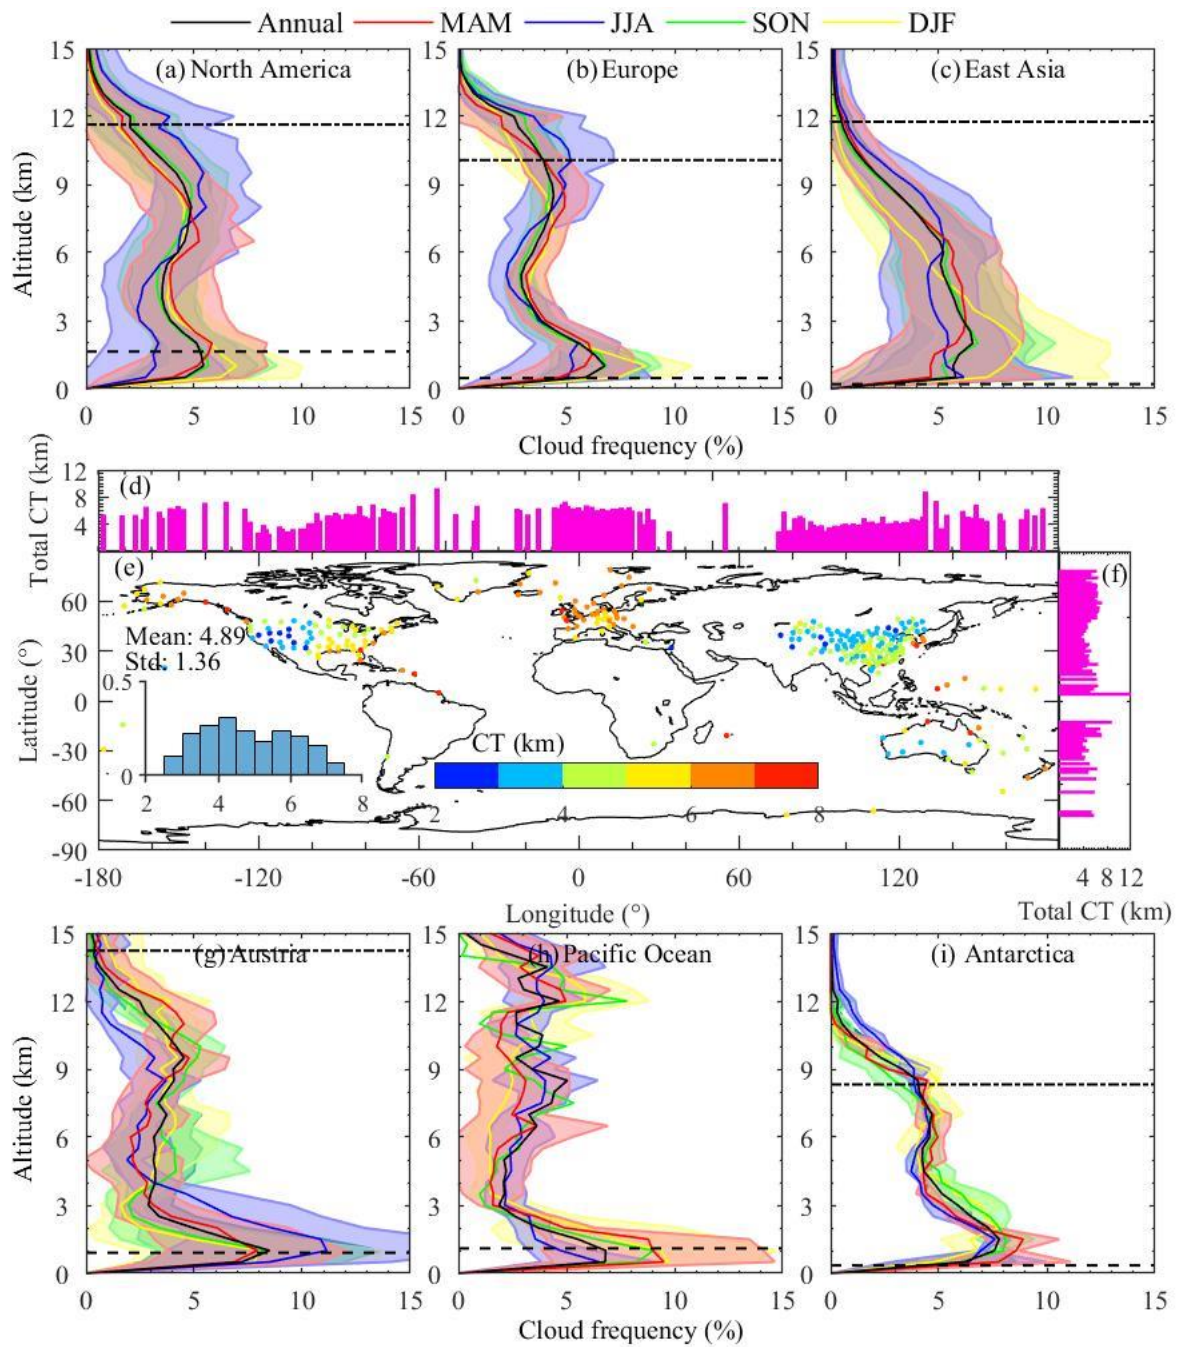

52

53 **Figure S8.** Similar as Fig. S6, but for the occurrence frequencies of clouds at 0000 UTC  
 54 during the period of 2018–2019.

55

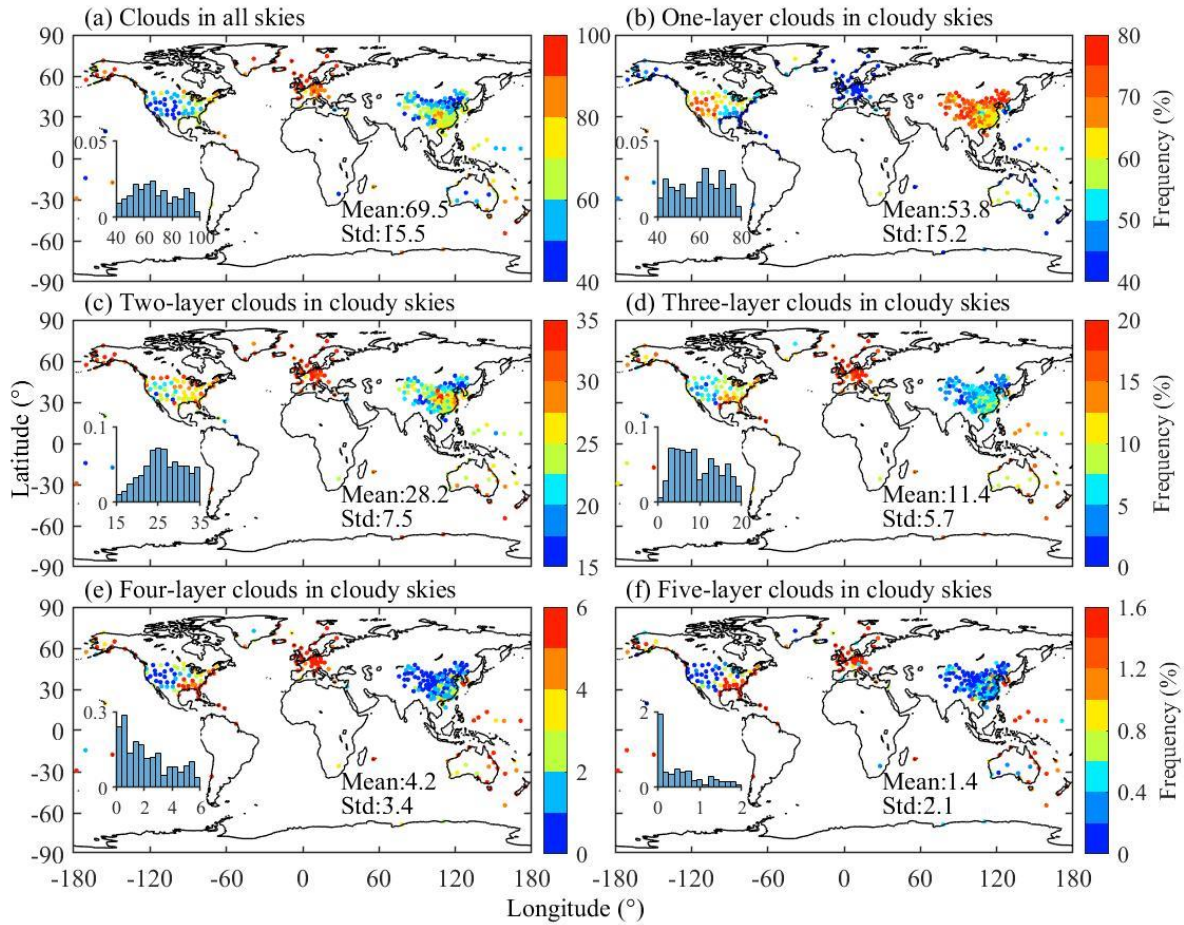

56

57 **Figure S9.** The geographic distributions of the occurrence frequencies of (a) clouds in all  
 58 skies, and (b, c, d, e, and f) one-, two-, three-, four-, and five-layer clouds in cloudy skies at  
 59 0000 UTC during the period of 2018–2019. It should be noted that the range of the color bar  
 60 differ a lot in order to improve the visual interpretation. Also shown are the histograms of  
 61 probability distributions for the cloud occurrence frequencies in each panel.

62

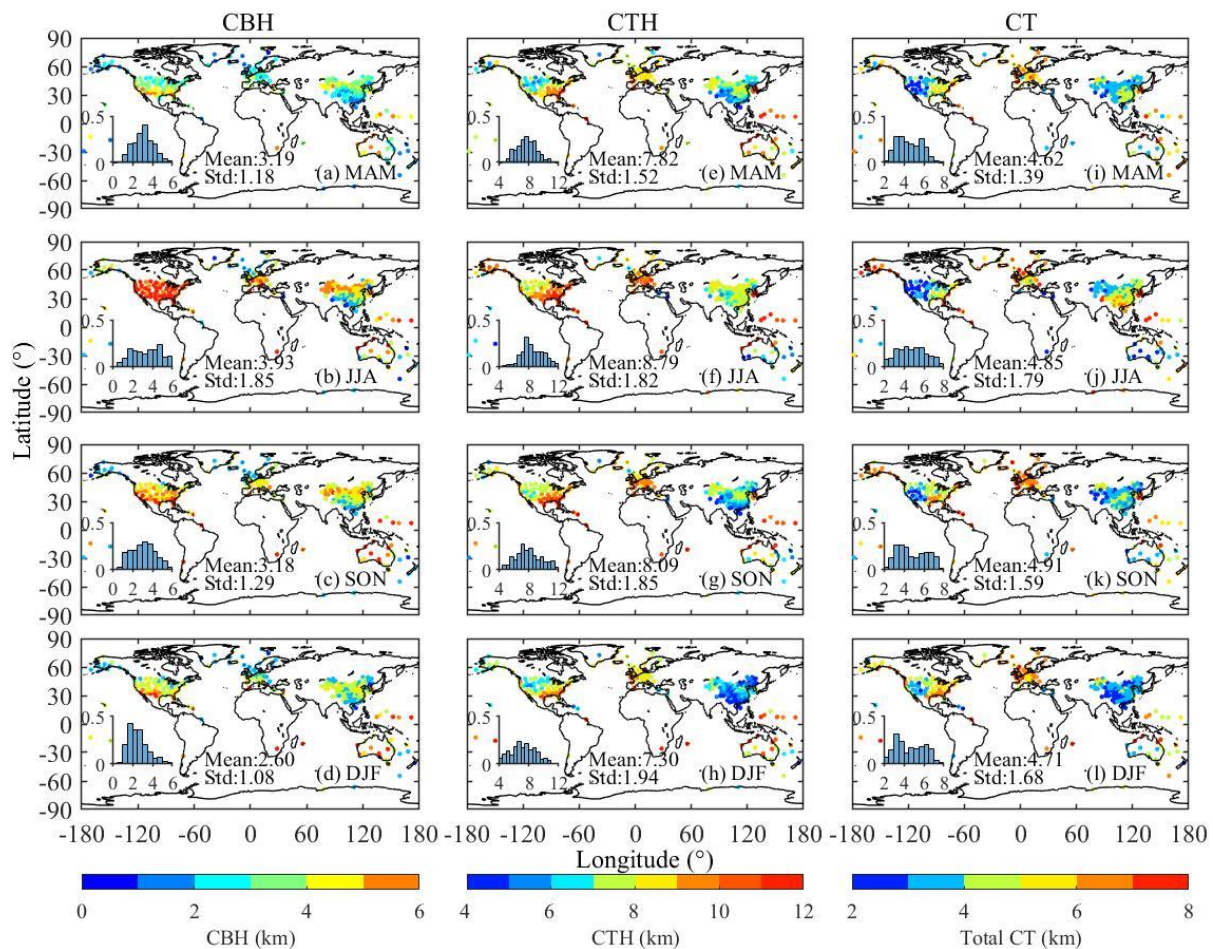

63  
 64 **Figure S10.** The geographic distributions of the seasonal mean CBHs (a, b, c, and d), CTHs  
 65 (e, f, g, and h), and CTs (i, j, k, and l) at 0000 UTC during the period of 2018–2019. Also  
 66 shown are the histograms of probability distributions for the CVS in each panel.

67



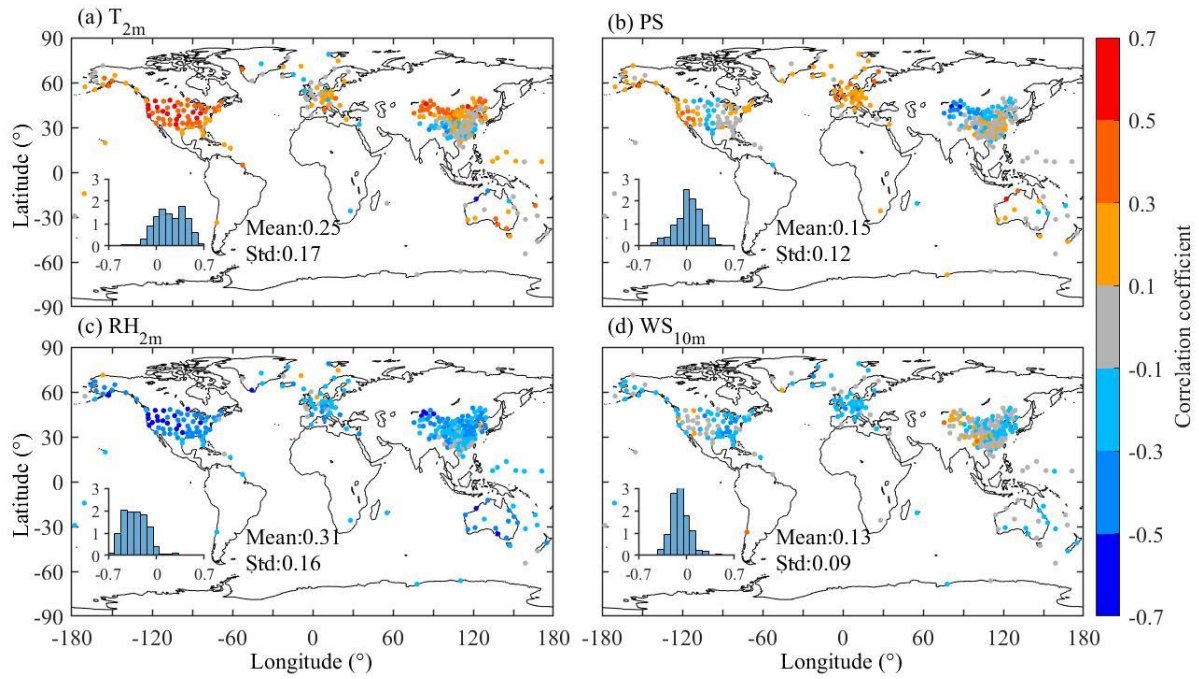

68  
69 **Figure S11.** Geographic distributions of the correlation coefficients ( $R$ ) between radiosonde-  
70 derived CBH and surface meteorological variables: (a) 2m air temperature ( $T_{2m}$ ), (b) surface  
71 pressure (PS), (c) 2m relatively humidity ( $RH_{2m}$ ), and (d) 10m wind speed ( $WS_{10m}$ ) at 0000  
72 UTC during the period of 2018–2019. Also shown are the histograms of probability  
73 distributions for their corresponding  $R$  values in each panel.

74

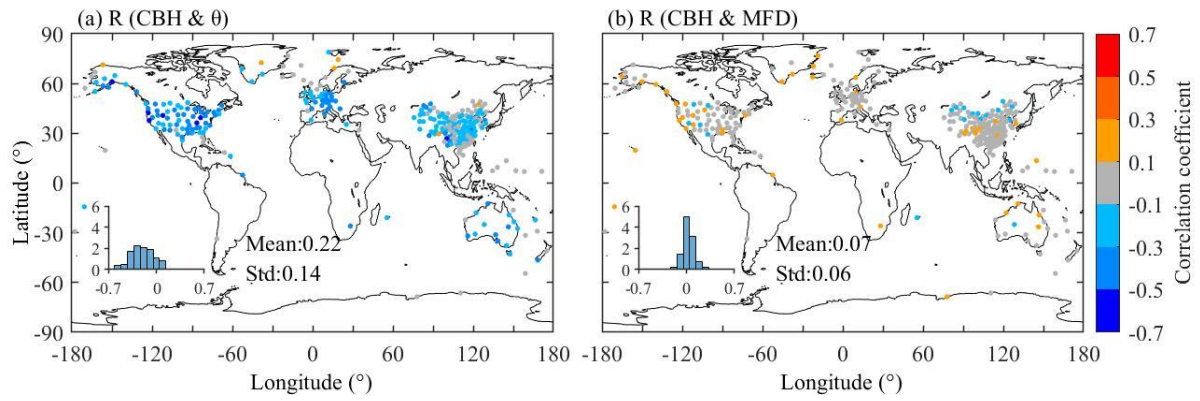

75

76 **Figure S12.** The same as Fig. S11, but for the correlations between CBH and (a) soil water  
 77 content ( $\theta$ ) and (b) moist flux divergence (MFD) at 0000 UTC during the period of 2018–  
 78 2019.

79



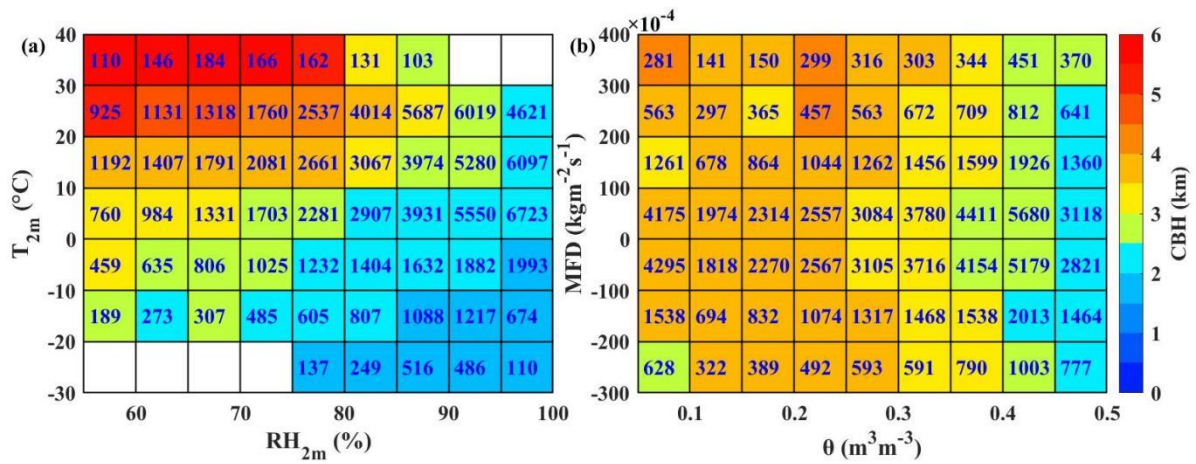

80  
 81 **Figure S13.** Joint dependences of CBH on (a)  $T_{2m}$  and  $RH_{2m}$ , (b)  $\theta$  and MFD at 0000  
 82 UTC during the period of 2018–2019. Note that the number labeled in each cell represents its  
 83 corresponding sample size.

84
